# Supplementary material for: Human Skin Keratinocytes on Sustained TGF-β Stimulation Reveal Partial EMT Features and Weaken Growth Arrest Responses
Source: Cells. 2020 Jan 20;9(1):255. doi: 10.3390/cells9010255 (PMC7017124; doi:10.3390/cells9010255)
Supplement: Supplementary file 1 [file cells-09-00255-s001.pdf]

**Table S1.** List of primers used for real time PCR.

| Primer Name  | Primer Sequence 5'to 3'                  |
|--------------|------------------------------------------|
| GAPDH-Fwd    | ACCACAGTCCATGCCATCAC                     |
| GAPDH-Rev    | TCCACCACCCTGTTGCTGTA                     |
| PAI 1 II-Fwd | GACATCCTGGAAGTCCCCTA                     |
| PAI 1 II-Rev | GGTCATGTTGCCTTTCCAGT                     |
| c-JUN-Fwd    | GGAAACGACCTTCTATGACGATGCCC               |
| c-JUN-Rev    | GGCGCGCACGAAGCCCTCGGCGAACC               |
| SNAI2-Fwd    | GATGCCGCGCTCCTTCCTGGTC                   |
| SNAI2-Rev    | GCTGCTTATGTTTGGCCAGCC                    |
| CDKN2B-Fwd   | ATGCGCGAGGAGAACAAG                       |
| CDKN2B-Rev   | CTCCCGAAACGGTTGACTC                      |
| CDKN1A-Fwd   | ATGTCAGAACCGGCTGGGGATG                   |
| CDKN1A-Rev   | GGGCTTCCTCTTGGAGAAGATC                   |
| GLB1         | Proprietary sequence (Sigma KiCqStart)   |
| MADH2        | Proprietary sequence (Sigma KiCqStart)   |
| MADH3        | Proprietary sequence (Sigma KiCqStart)   |
| MADH4        | Proprietary sequence (Sigma KiCqStart)   |
| MADH7        | Proprietary sequence (Qiagen QuantiTect) |
| TBR-I-Fwd    | TGTTGGTACCCAAGGAAAGC                     |
| TBR-I-Rev    | CACTCTGTGGTTTGGAGCAA                     |
| TBR-II-Fwd   | ATGAGCAACTGCAGCATCAC                     |
| TBR-II-Rev   | GGAGAAGCAGCATCTTCCAG                     |
| TGFB1        | Proprietary sequence (Qiagen QuantiTect) |
| TGFB2        | Proprietary sequence (Qiagen QuantiTect) |
| TGFB3        | Proprietary sequence (Qiagen QuantiTect) |
| IL1B         | Proprietary sequence (Qiagen QuantiTect) |
| IL6          | Proprietary sequence (Qiagen QuantiTect) |
| TNF          | Proprietary sequence (Qiagen QuantiTect) |

**Table S2.** Apoptosis assessment. HaCaT cells were maintained either in full medium (FM) or serum deprived conditions (SS), in the absence or presence of TGF- $\beta$ 1 for the indicated time. Data represent percentage of combined early and late apoptotic cell fractions from three independent experiments  $\pm$  SEM.

| 48 h | Control        | TGF- $\beta$ 1 |
|------|----------------|----------------|
| FM   | 3.2 $\pm$ 1.1% | 5.1 $\pm$ 1.3% |
| SS   | 6.9 $\pm$ 1.8% | 6.3 $\pm$ 1.6% |

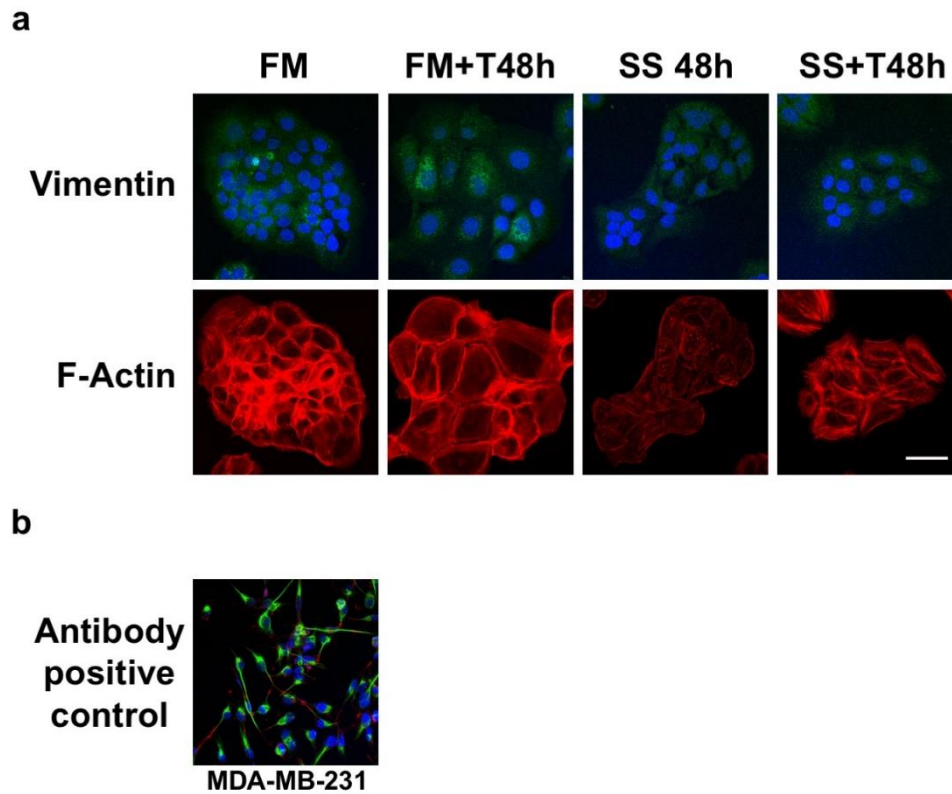

**Figure S1.** Continuous TGF- $\beta$ 1 stimulation does not induce Vimentin filaments in HaCaT cells. **(a)** Confocal microscopy studies on the expression and localization of Vimentin with or without TGF- $\beta$ 1. **(b)** Note the absence of Vimentin filaments when compared with positive controls performed on MDA-MB-231 breast cancer cell line. Representative images of at least three independent experiments are shown. Scale bar: 50  $\mu$ m.

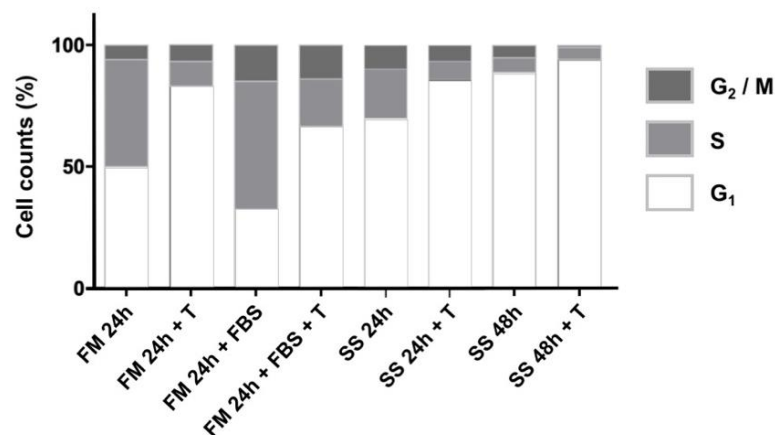

**Figure S2.** Acute TGF- $\beta$ 1 treatment induces cell cycle arrest to HaCaT keratinocytes. Cells were maintained either in full medium (FM) or serum deprived conditions (SS) for the indicated times, then treatments in the form of TGF- $\beta$ 1 [+ T] inoculation and/or extra fetal bovine serum (FBS) supplementation were applied. Representative data from at least three independent experiment are shown.
